# Supplementary material for: Hierarchical mesoporous silicas templated by PE-b-PEO-b-PLA triblock copolymer for fluorescent drug delivery
Source: Royal Society of Chemistry journal article supplement (doi:10.1039/c5ra26940g), 2016-01-01
Supplement: c5ra26940g1.pdf [file c5ra26940g1.pdf]

## Supporting Information for

# Hierarchical Mesoporous Silicas Templated by PE-*b*-PEO-*b*-PLA Triblock Copolymer for Fluorescent Drug-Delivery

Wei-Cheng Chu,<sup>a</sup> Chien-Chen Cheng,<sup>a</sup> Bishnu Prasad Bastakoti,<sup>b</sup> and Shiao-Wei Kuo<sup>a,\*</sup>

*<sup>a</sup>Department of Materials and Optoelectronic Science, National Sun Yat-Sen University, Kaohsiung,  
804, Taiwan*

*E-mail: [kuosw@faculty.nsysu.edu.tw](mailto:kuosw@faculty.nsysu.edu.tw)*

*<sup>b</sup> World Premier International (WPI) Research Center for Materials Nanoarchitectonics (MANA)  
National Institute for Materials Science (NIMS), 1-1 Namiki, Tsukuba, Ibaraki 305-0044 (Japan)*

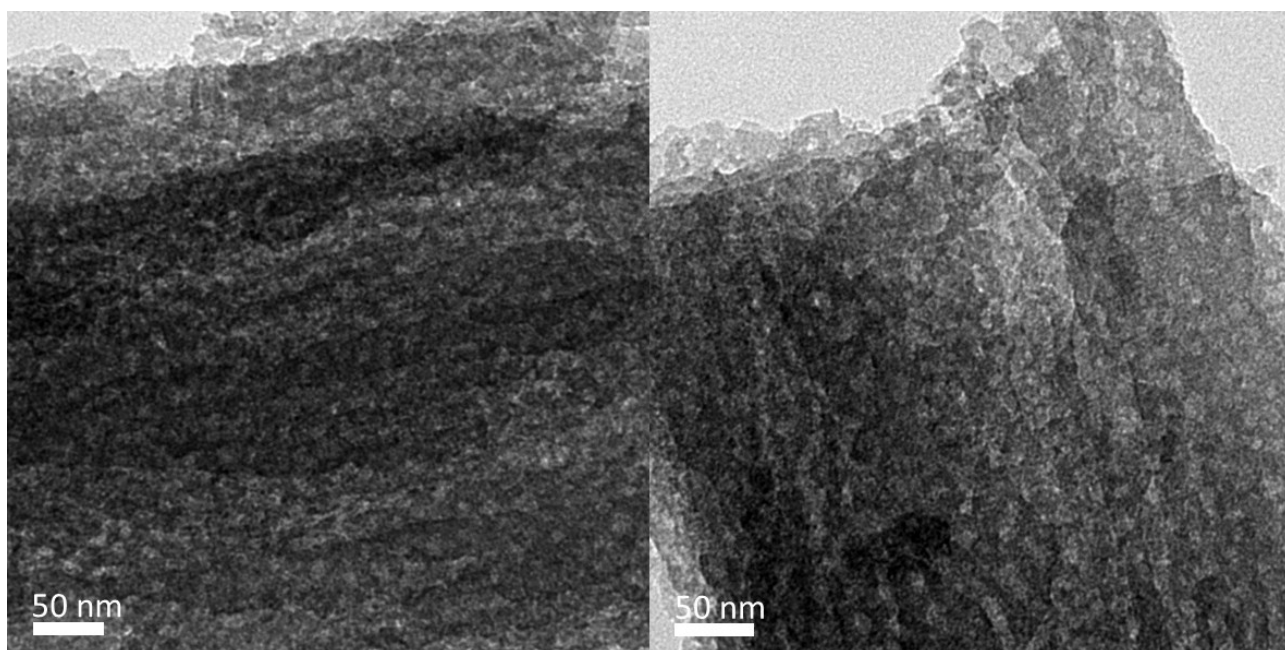

**Figure S1.** TEM images of mesoporous silicas templated by E<sub>13</sub>-*b*-EO<sub>42</sub> at weight fractions of TEOS/templated = 1:1.

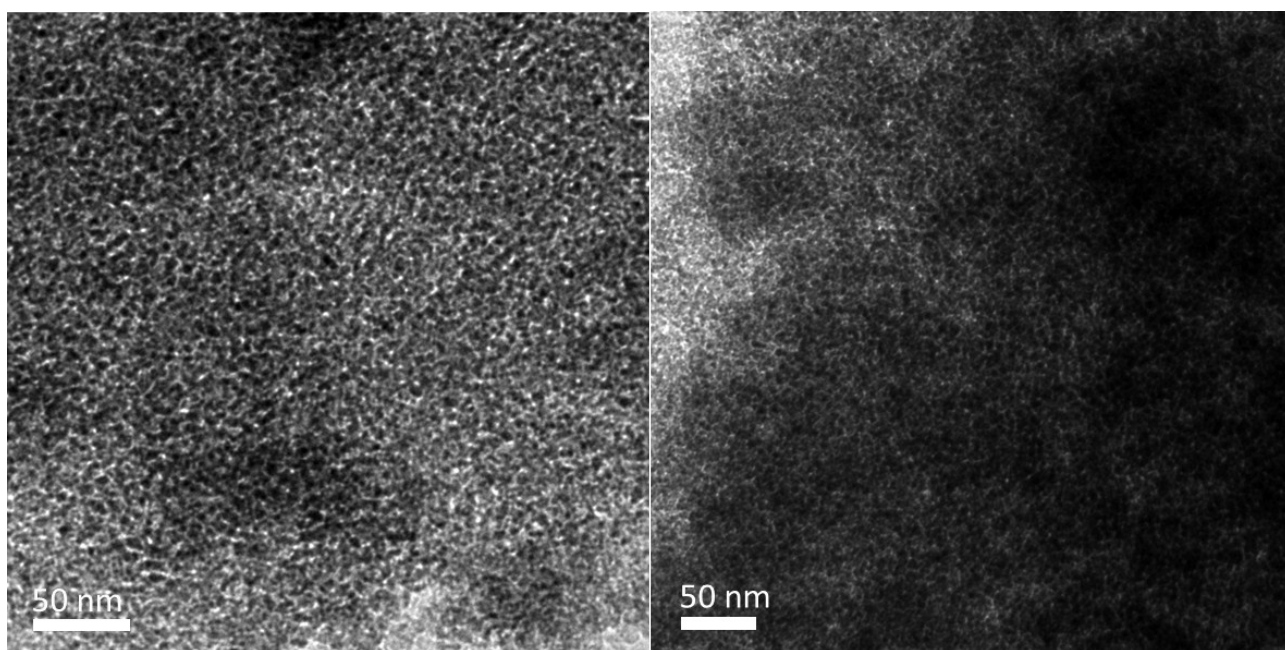

**Figure S2.** TEM images of mesoporous silicas templated by PE<sub>13</sub>-*b*-EO<sub>42</sub>-*b*-LA<sub>11</sub> at weight fractions of TEOS/templated = 1:1.

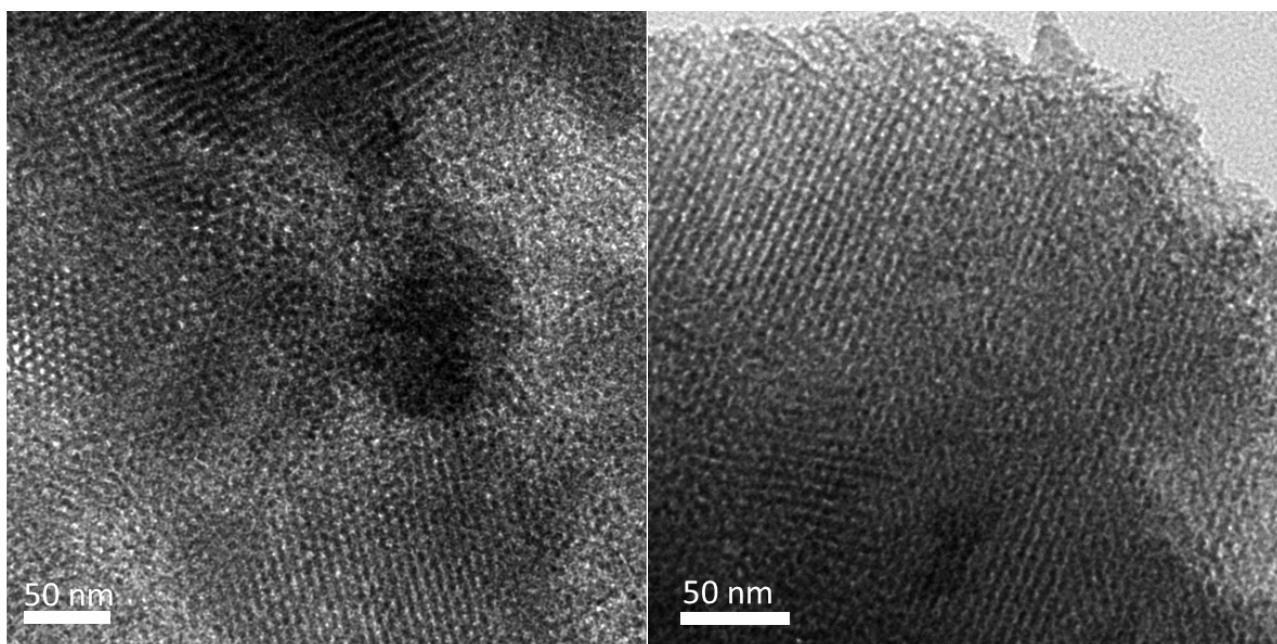

**Figure S3.** TEM images of mesoporous silicas templated by  $PE_{13}\text{-}b\text{-}EO_{42}\text{-}b\text{-}LA_{11}$  at weight fractions of TEOS/templated = 3:1.

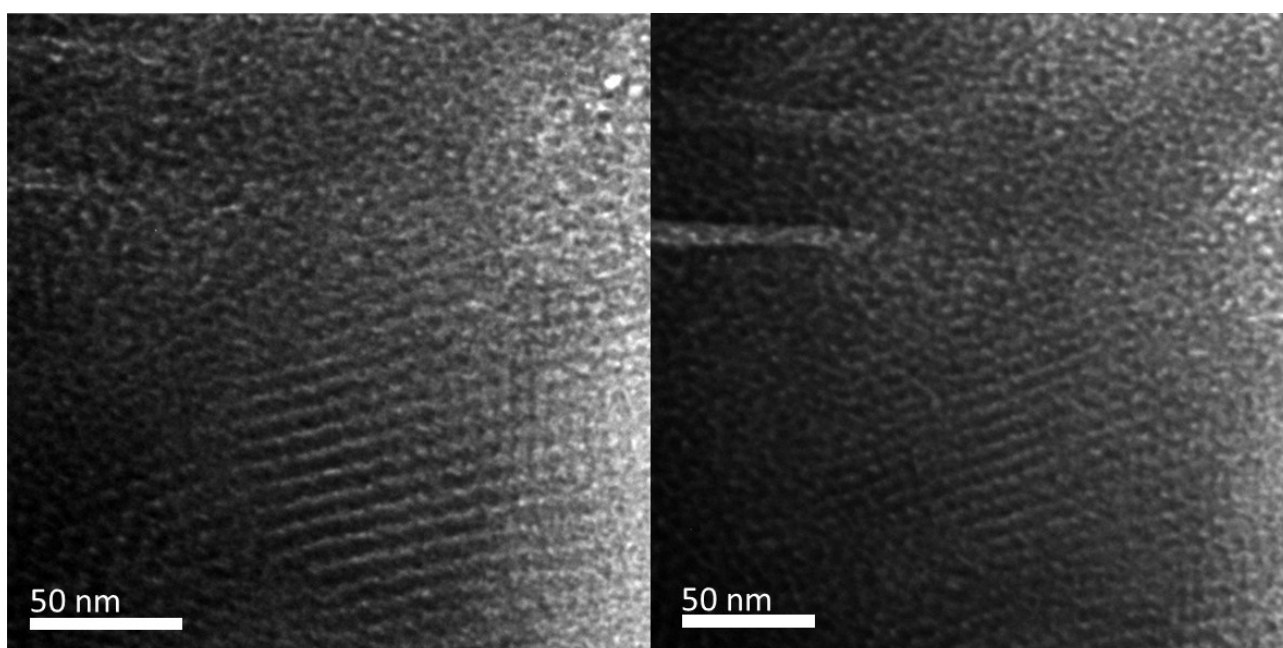

**Figure S4.** TEM images of mesoporous silicas templated by  $PE_{13}\text{-}b\text{-}EO_{42}\text{-}b\text{-}LA_{11}$  at weight fractions of TEOS/templated = 5:1.

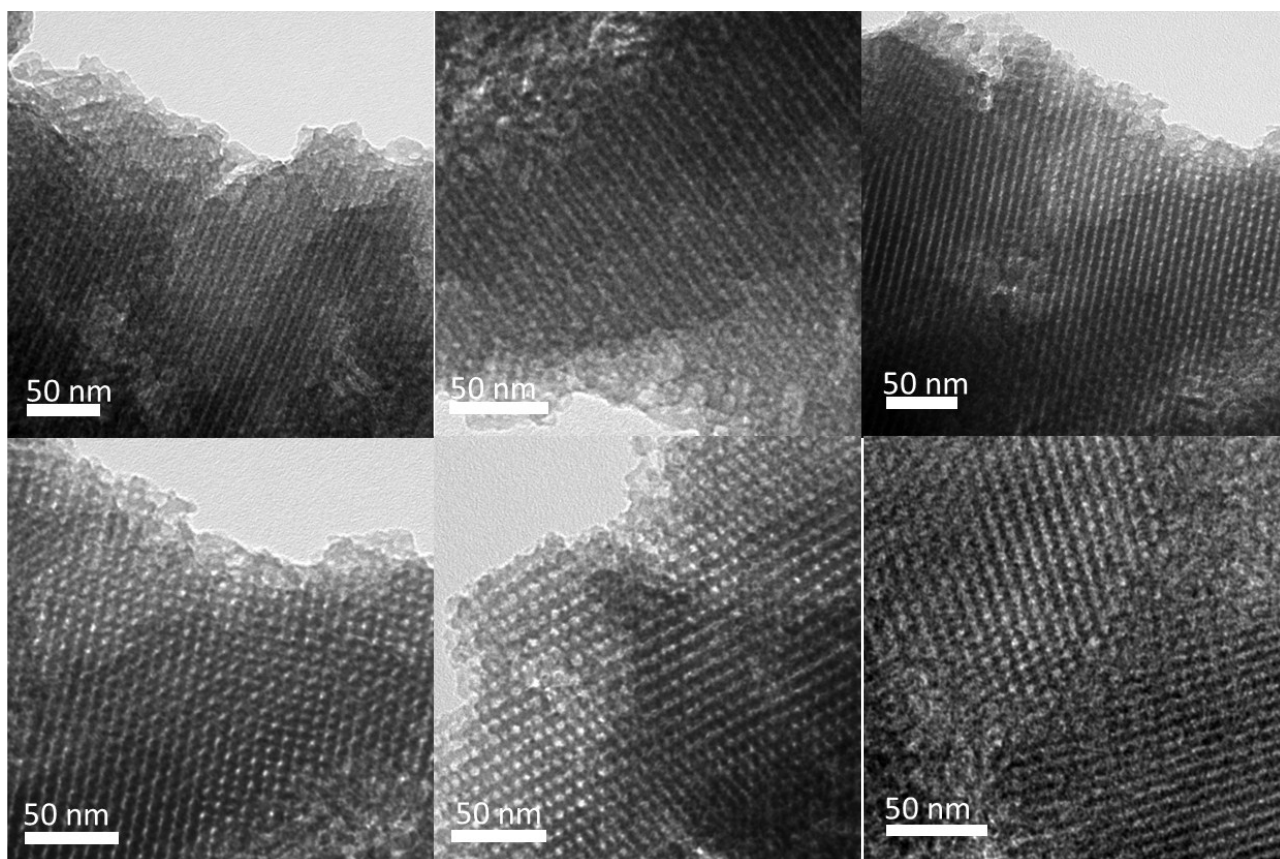

**Figure S5.** TEM images of mesoporous silicas templated by  $E_{13}\text{-}b\text{-}EO_{42}\text{-}b\text{-}LA_{26}$  at weight fractions of TEOS/templated = 5:1.
